# Supplementary material for: The Changing Landscape of Community Mental Health Care: Availability of Treatment Services in National Data, 2010–2017
Source: Atypon-hosted journal article supplement (doi:10.1176/appi.ps.201900546), 2020-12-18
Supplement: appi.ps.201900546.ds001.pdf [file appi.ps.201900546.ds001.pdf]

## Online Supplement

Services offered by U.S. outpatient mental health facilities (OMHFs) and inpatient, residential and partial-inpatient health facilities (IMHFs) from 2010 to 2017 – unadjusted risk ratios.

|                                                           | Outpatient Mental Health Facilities |                |                          |           | Inpatient, Residential, and Partial-IP Mental Health Facilities |                |                          |           |
|-----------------------------------------------------------|-------------------------------------|----------------|--------------------------|-----------|-----------------------------------------------------------------|----------------|--------------------------|-----------|
|                                                           | 2010<br>n=6505                      | 2017<br>n=8805 | 2017 compared to<br>2010 |           | 2010<br>n=2038                                                  | 2017<br>n=2698 | 2017 compared to<br>2010 |           |
|                                                           | %                                   | %              | Unadj<br>RR              | 95%CI     | %                                                               | %              | Unadj<br>RR              | 95%CI     |
| <i>Crisis Services</i>                                    |                                     |                |                          |           |                                                                 |                |                          |           |
| Psychiatric Emergency Walk-in Services <sup>ab</sup>      | 41.86                               | 34.28          | <b>0.82</b>              | 0.78-0.86 | 23.87                                                           | 20.21          | <b>0.84</b>              | 0.74-0.95 |
| Crisis Intervention Team (onsite or offsite) <sup>b</sup> | 58.77                               | 49.88          | <b>0.85</b>              | 0.81-0.89 | 55.98                                                           | 44.72          | <b>0.79</b>              | 0.73-0.86 |
| Suicide Prevention Services <sup>c</sup>                  | 59.28                               | 58.86          | 0.99                     | 0.95-1.03 | 54.04                                                           | 51.21          | 0.95                     | 0.88-1.03 |
| <i>Substance Use Treatment</i>                            |                                     |                |                          |           |                                                                 |                |                          |           |
| Substance Use Treatment <sup>d</sup>                      | 54.43                               | 60.31          | <b>1.11</b>              | 1.06-1.16 | 36.80                                                           | 41.23          | <b>1.12</b>              | 1.02-1.23 |
| <i>Other Services</i>                                     |                                     |                |                          |           |                                                                 |                |                          |           |
| Telemedicine Services                                     | 18.55                               | 33.96          | <b>1.83</b>              | 1.72-1.96 | 6.59                                                            | 13.98          | <b>2.14</b>              | 1.75-2.60 |
| Integrated Primary Care Services*                         | 23.05                               | 24.41          | 1.07                     | 1.00-1.13 | 27.05                                                           | 25.68          | 0.97                     | 0.87-1.07 |
| Case Management Services                                  | 76.82                               | 68.84          | <b>0.90</b>              | 0.86-0.93 | 66.59                                                           | 59.32          | <b>0.89</b>              | 0.83-0.96 |
| Intensive Case Management*                                | 30.06                               | 27.30          | <b>0.91</b>              | 0.86-0.96 | 16.50                                                           | 12.36          | <b>0.76</b>              | 0.66-0.87 |
| Assertive Community Treatment                             | 19.71                               | 16.23          | <b>0.83</b>              | 0.77-0.89 | 12.54                                                           | 5.28           | <b>0.41</b>              | 0.33-0.50 |
| Peer Services (consumer-run peer-support)                 | 20.87                               | 26.80          | <b>1.29</b>              | 1.20-1.37 | 12.06                                                           | 17.46          | <b>1.47</b>              | 1.26-1.71 |
| Housing Services                                          | 23.20                               | 21.41          | <b>0.92</b>              | 0.86-0.99 | 26.20                                                           | 19.88          | <b>0.76</b>              | 0.67-0.85 |
| Supported Employment                                      | 23.76                               | 19.14          | <b>0.81</b>              | 0.75-0.86 | 11.91                                                           | 9.72           | <b>0.82</b>              | 0.69-0.97 |
| Supported Housing                                         | 20.23                               | 16.89          | <b>0.83</b>              | 0.77-0.90 | 13.56                                                           | 9.54           | <b>0.70</b>              | 0.59-0.83 |

Notes: \* denotes that N-MHSS did not inquire about services until 2014; therefore, percentages and comparisons use 2014 data (first available) instead of 2010 data. Total outpatient facilities in 2014 = 8958. Total inpatient facilities in 2014 = 3224. **BOLD** = statistically significant relative risk estimate at  $p = 0.05$ . RR = relative risk. 95%CI = 95% confidence interval. IP = inpatient.

<sup>a</sup> **Psychiatric emergency walk-in services** have specifically trained staff to provide psychiatric care, such as crisis intervention, in emergency situations on a walk-in basis. They enable the individual, family members and friends to cope with the emergency while helping the individual function as a member of the community to the greatest extent possible.<sup>1</sup>

<sup>b</sup> Derived from the question, Does this facility offer a crisis intervention team that handles acute mental health issues at this facility and/or off-site?<sup>1</sup>

<sup>c</sup> **Suicide prevention services** include identifying risk factors; educating staff on identifying the signs of suicidal behavior and using methods to detect risk; and the assessment, intervention, and management of suicidal patients including treatment of an underlying mental or substance use disorder, and use of psychotropic medication, supportive services, and education. Hotlines help individuals to contact the nearest suicide prevention mental health provider.<sup>1</sup>

<sup>d</sup> **Substance abuse treatment** refers to a broad range of activities or services, including identification of the problem (and engaging the individual in treatment); brief interventions; assessment of substance abuse and related problems including histories of various types of abuse; diagnosis of the problem(s); and treatment planning, including counseling, medical services, psychiatric services, psychological services, social services and follow-up for persons with alcohol or other drug problems.<sup>1</sup>
